# Supplementary material for: Quantifying the impact of heat on human physical work capacity; part III: the impact of solar radiation varies with air temperature, humidity, and clothing coverage
Source: PubMed Central journal article supplement (PMC8727397; doi:10.1007/s00484-021-02205-x), 2021-10-28
Supplement: 484_2021_2205_MOESM1_ESM.pdf [file 484_2021_2205_MOESM1_ESM.pdf]

# Supplementary file

1  
2

3 This supplementary file contains:

- 4 1. A study design schematic with accompanying description.
- 5 2. The trials completed for each individual participant.
- 6 3. Individual responses for high and low clothing coverage.
- 7 4. Temporal core and skin temperature responses to each condition.

8  
9

## 10 Study schematic

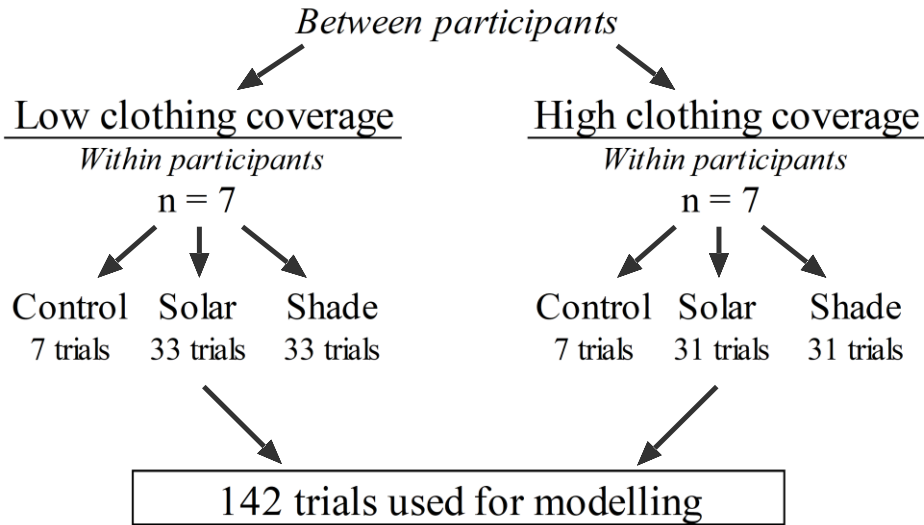

| Effect of solar on PWC tested in 7 climates |    |
|---------------------------------------------|----|
| $T_a$                                       | Rh |
| 25                                          | 20 |
| 25                                          | 80 |
| 30                                          | 80 |
| 35                                          | 20 |
| 35                                          | 80 |
| 40                                          | 20 |
| 45                                          | 20 |

11

12 **Figure S1.** Study schematic. Fourteen participants were enrolled, with 7 completing SOLAR vs  
 13 SHADE trials in low clothing coverage (0.3 Clo), and 7 in high clothing coverage (0.9 Clo).  
 14 After completing a trial in a reference (control) environment of 15°C, 50% Rh, SOLAR vs  
 15 SHADE comparisons were conducted. Experimental trials were always completed on separate  
 16 days, at the same time of day within subjects. A SOLAR vs SHADE trial was always completed  
 17 in the same environment sequentially (one followed the other). For example, if a SOLAR trial  
 18 was conducted at 25°C, 80% Rh, the next trial would be in the same environment, but in  
 19 SHADE. All data collected in this study was used for modelling purposes (see Figure 3 main  
 20 text).

21 Individual trials completed by each participant.

**Table S1.** Trials performed by each participant. Apart from the reference/control condition, which was completed once, a cross denotes that a participant has completed both a shaded and solar trial within the specified environment.

| <i>Low clothing coverage</i> |           | <b>Participant ID</b> |           |          |           |           |           |           |               |
|------------------------------|-----------|-----------------------|-----------|----------|-----------|-----------|-----------|-----------|---------------|
| <b><math>T_a</math></b>      | <b>Rh</b> | <b>1</b>              | <b>3</b>  | <b>5</b> | <b>7</b>  | <b>8</b>  | <b>10</b> | <b>11</b> |               |
| 15                           | 50        | <i>x</i>              | <i>x</i>  | <i>x</i> | <i>x</i>  | <i>x</i>  | <i>x</i>  | <i>x</i>  | <b>7</b>      |
| 25                           | 20        | <i>x</i>              | <i>x</i>  | <i>x</i> | <i>x</i>  | <i>x</i>  |           |           | <b>10</b>     |
|                              | 80        | <i>x</i>              | <i>x</i>  |          | <i>x</i>  | <i>x</i>  |           | <i>x</i>  | <b>10</b>     |
| 30                           | 80        | <i>x</i>              | <i>x</i>  | <i>x</i> | <i>x</i>  | <i>x</i>  | <i>x</i>  | <i>x</i>  | <b>14</b>     |
| 35                           | 20        | <i>x</i>              | <i>x</i>  | <i>x</i> | <i>x</i>  | <i>x</i>  |           |           | <b>10</b>     |
|                              | 80        |                       | <i>x</i>  |          | <i>x</i>  |           | <i>x</i>  | <i>x</i>  | <b>8</b>      |
| 40                           | 20        | <i>x</i>              | <i>x</i>  |          | <i>x</i>  | <i>x</i>  |           | <i>x</i>  | <b>10</b>     |
| 45                           | 20        |                       | <i>x</i>  |          |           |           |           | <i>x</i>  | <b>4</b>      |
| <b>Total trials</b>          |           | <b>11</b>             | <b>15</b> | <b>7</b> | <b>13</b> | <b>11</b> | <b>5</b>  | <b>11</b> | $\Sigma = 73$ |

  

| <i>High clothing coverage</i> |           | <b>Participant ID</b> |           |          |          |           |           |           |               |
|-------------------------------|-----------|-----------------------|-----------|----------|----------|-----------|-----------|-----------|---------------|
| <b><math>T_a</math></b>       | <b>Rh</b> | <b>2</b>              | <b>3</b>  | <b>4</b> | <b>6</b> | <b>9</b>  | <b>12</b> | <b>13</b> |               |
| 15                            | 50        | <i>x</i>              | <i>x</i>  | <i>x</i> | <i>x</i> | <i>x</i>  | <i>x</i>  | <i>x</i>  | <b>7</b>      |
| 25                            | 20        | <i>x</i>              | <i>x</i>  |          |          | <i>x</i>  | <i>x</i>  |           | <b>8</b>      |
|                               | 80        |                       | <i>x</i>  | <i>x</i> | <i>x</i> | <i>x</i>  | <i>x</i>  | <i>x</i>  | <b>12</b>     |
| 30                            | 80        |                       | <i>x</i>  |          | <i>x</i> | <i>x</i>  | <i>x</i>  | <i>x</i>  | <b>10</b>     |
| 35                            | 20        |                       | <i>x</i>  | <i>x</i> |          | <i>x</i>  | <i>x</i>  | <i>x</i>  | <b>10</b>     |
|                               | 80        |                       | <i>x</i>  |          |          | <i>x</i>  |           |           | <b>4</b>      |
| 40                            | 20        | <i>x</i>              | <i>x</i>  | <i>x</i> |          | <i>x</i>  | <i>x</i>  | <i>x</i>  | <b>12</b>     |
| 45                            | 20        |                       | <i>x</i>  |          |          | <i>x</i>  |           | <i>x</i>  | <b>6</b>      |
| <b>Total trials</b>           |           | <b>5</b>              | <b>15</b> | <b>7</b> | <b>5</b> | <b>15</b> | <b>11</b> | <b>11</b> | $\Sigma = 69$ |

23 Individual physical work capacity responses

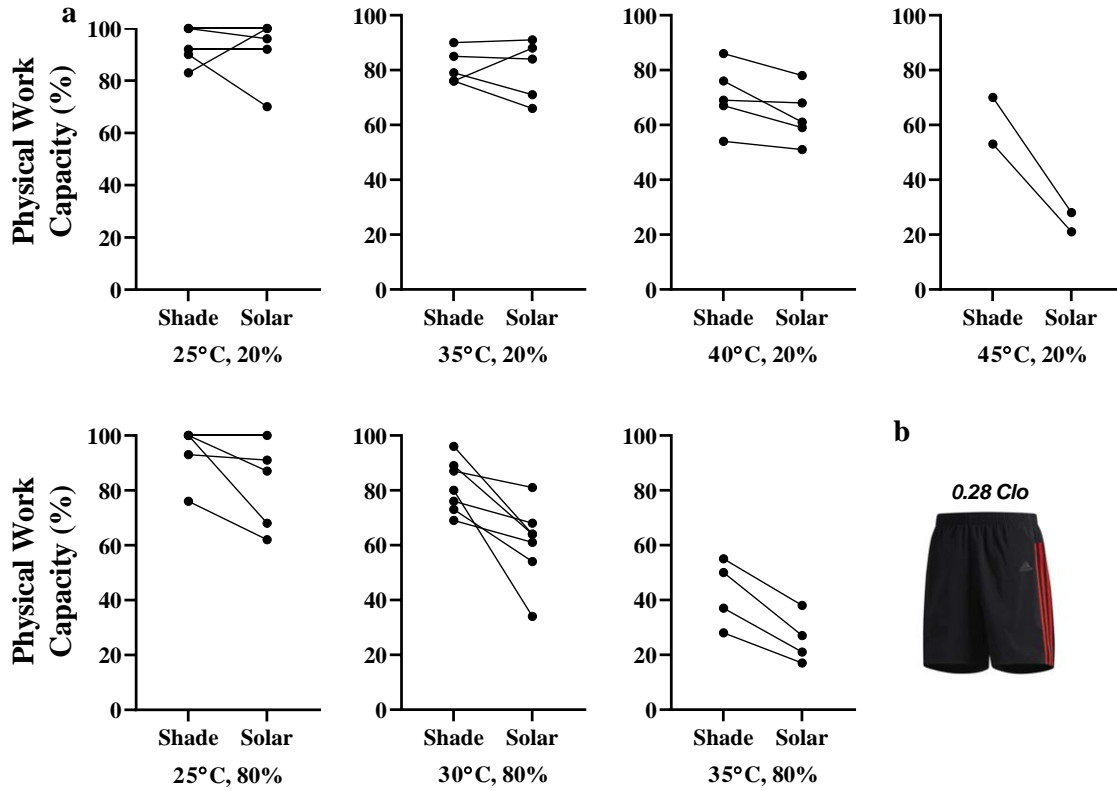

24

25 **Figure S2.** Individual physical work capacity responses in each condition, with and without  
 26 solar, in low clothing coverage (shown in panel b).

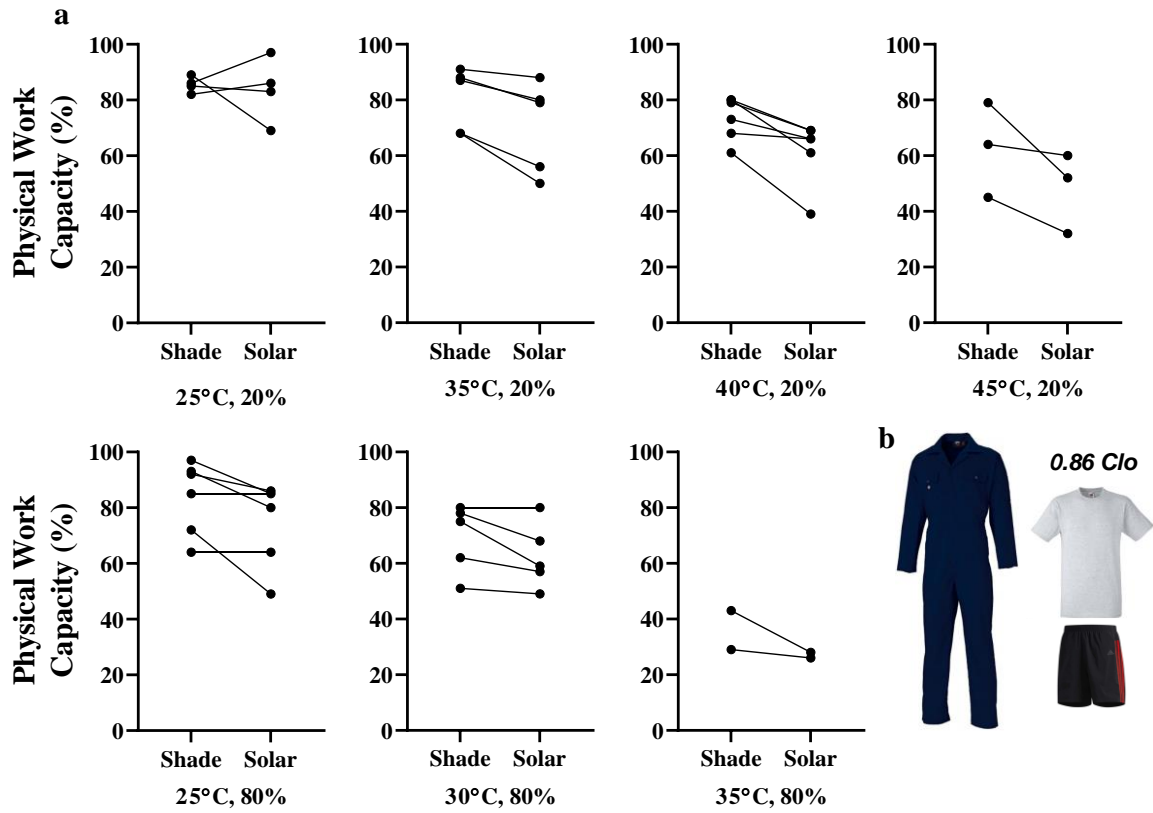

27

28 **Figure S3.** Individual physical work capacity responses in each condition, with and without  
 29 solar, in high clothing coverage (shown in panel b).

30

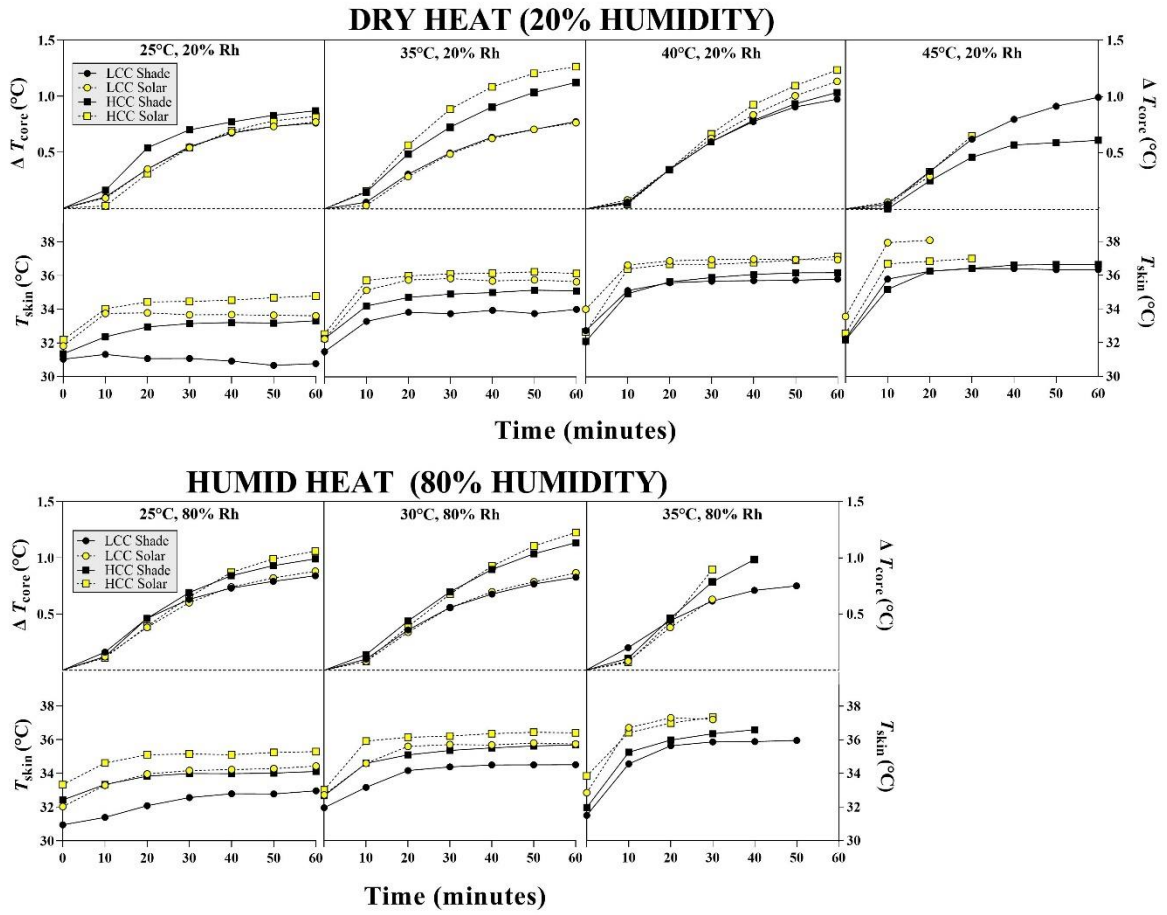

31

32 **Figure S4. Temporal rectal (core) and mean skin temperature responses.** Data are presented  
 33 as the average score at each time point. Error bars were omitted to increase clarity in data  
 34 presentation.
